# Supplementary material for: A rhodamine appended tripodal receptor as a ratiometric probe for Hg2+ ions
Source: Royal Society of Chemistry journal article supplement (doi:10.1039/c2ob00009a), 2012-01-01
Supplement: c2ob00009a.pdf [file c2ob00009a.pdf]

# Rhodamine appended tripodal receptor as a ratiometric probe for Hg<sup>2+</sup> ions

Kumaresh Ghosh<sup>\*a</sup>, Tanmay Sarkar<sup>a</sup>, Asmita Samadder<sup>b</sup>

<sup>a</sup>Department of Chemistry, University of Kalyani, Kalyani-741235, India.  
Email: ghosh\_k2003@yahoo.co.in, Fax: +913325828282; Tel: +913325828750;  
<sup>b</sup>Department of Zoology, University of Kalyani, Kalyani-741235.

## 1. Change in absorbance of receptor 1 with various metal ions in MeCN/water (4/1,v/v; 10 μM tris HCl buffer; pH = 7.0)

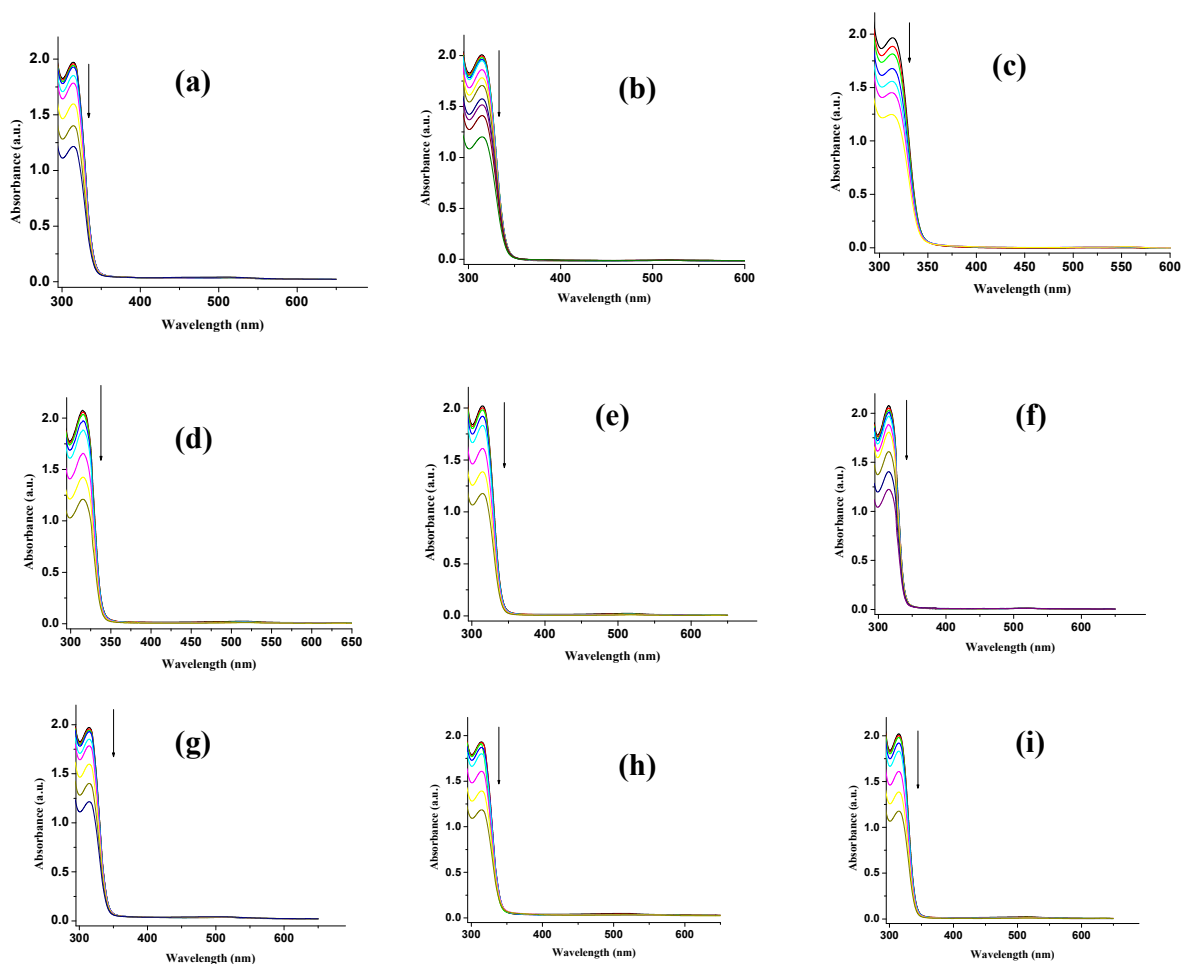

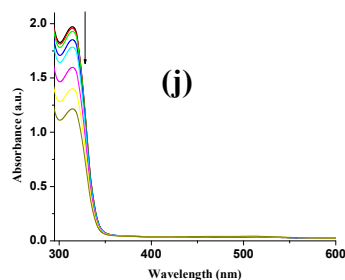

**Figure 1S.** Absorption titration spectra for **1** ( $c = 4.41 \times 10^{-5}$  M) with (a) Co<sup>2+</sup>, (b) Zn<sup>2+</sup>, (c) Cu<sup>2+</sup>, (d) Mg<sup>2+</sup>, (e) Ni<sup>2+</sup>, (f) Cd<sup>2+</sup>, (g) Pb<sup>2+</sup>, (h) Fe<sup>2+</sup>, (i) Mn<sup>2+</sup> and (j) Ag<sup>+</sup> in MeCN/water (4/1,v/v; 10  $\mu$ M tris HCl buffer; pH = 7.0 ) (in all cases [cation] =  $8.82 \times 10^{-4}$  M).

## 2. Change in emission of receptor 1 with Zn<sup>2+</sup>, Cu<sup>2+</sup>, Fe<sup>2+</sup>, Cd<sup>2+</sup>, Co<sup>2+</sup>, Pb<sup>2+</sup>, Mn<sup>2+</sup>, Mg<sup>2+</sup>, Ni<sup>2+</sup>, Ag<sup>+</sup> in MeCN/Water (4/1,v/v; 10 $\mu$ M tris HCl buffer; pH 7.0).

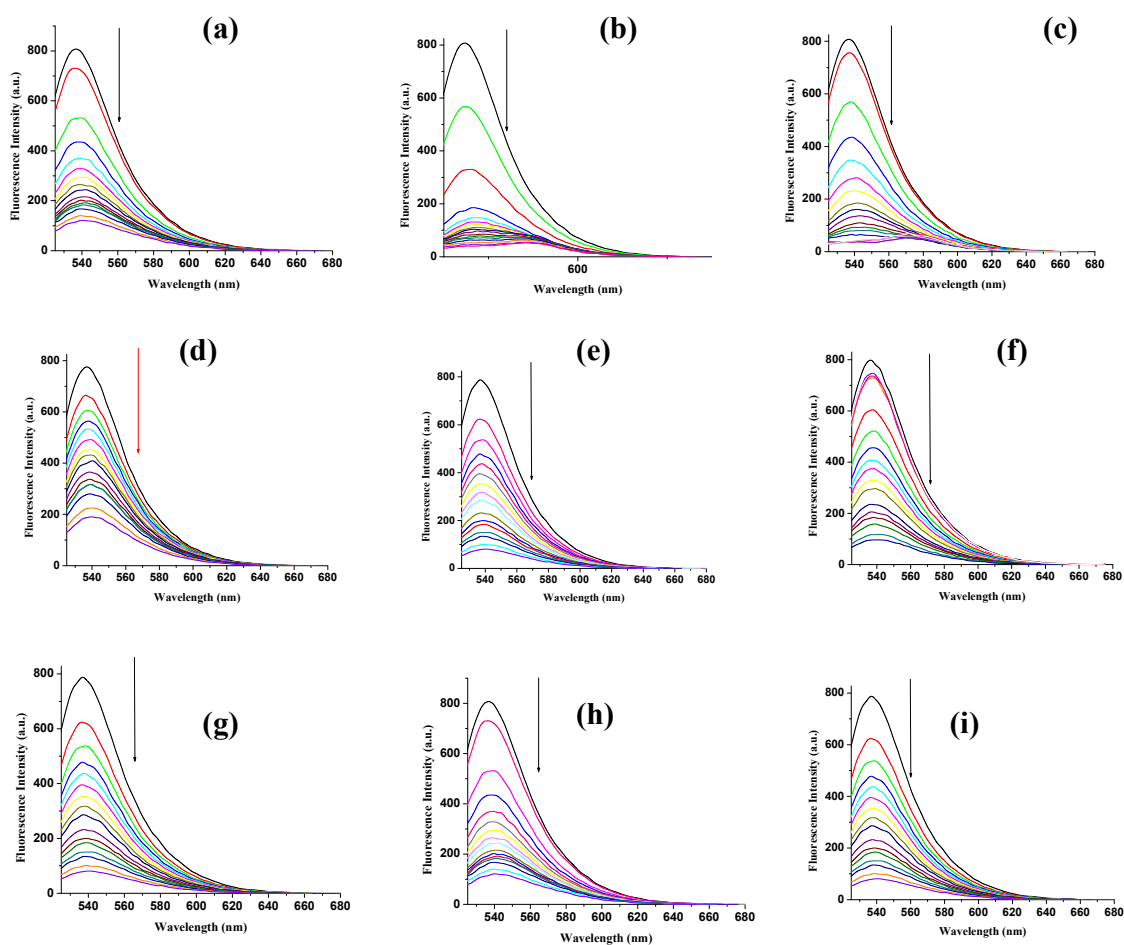

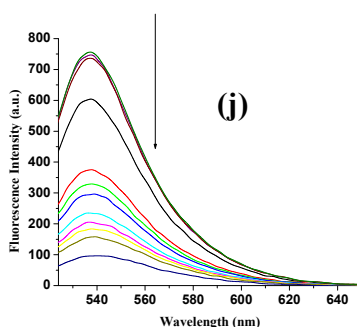

**Figure 2S.** Change in emission of receptor **1** ( $c = 4.41 \times 10^{-5}$  M) upon addition of (a)  $\text{Zn}^{2+}$ , (b)  $\text{Cu}^{2+}$ , (c)  $\text{Fe}^{2+}$ , (d)  $\text{Cd}^{2+}$ , (e)  $\text{Co}^{2+}$ , (f)  $\text{Pb}^{2+}$ , (g)  $\text{Mg}^{2+}$ , (h)  $\text{Mn}^{2+}$ , (i)  $\text{Ni}^{2+}$ , (j)  $\text{Ag}^+$  in MeCN/Water (4/1, v/v; 10  $\mu\text{M}$  tris HCl buffer; pH = 7.0) (in all cases [cation] =  $8.82 \times 10^{-4}$  M) [ $\lambda_{\text{exc}} = 510$  nm].

### 3. Change in fluorescence ratio at 536 nm.

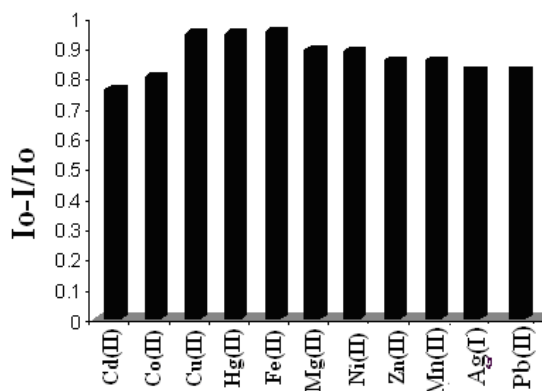

**Figure 3S.** Change in fluorescence ratio of **1** ( $c = 4.41 \times 10^{-5}$  M) at 536 nm upon addition of 18 equiv. amounts of cations.

### 4. UV Job plot for **1** with $\text{Hg}^{2+}$ measured at 556 nm.

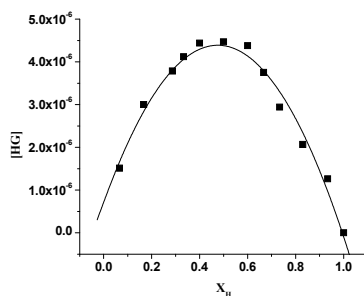

**Figure 4S.** UV Job plot for **1** with  $\text{Hg}^{2+}$  in MeCN/Water (4/1, v/v; 10  $\mu\text{M}$  tris HCl buffer; pH = 7.0) ([H] = [G] =  $4.41 \times 10^{-5}$  M).

## 5. Emission titration spectra of **1** with $\text{Hg}^{2+}$ in MeCN/Water (4/1,v/v; 35 $\mu\text{M}$ tris HCl buffer, pH 7.0)

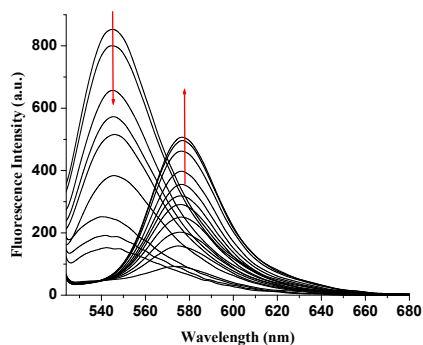

**Figure 5S.** Change in fluorescence spectra of **1** ( $c = 4.35 \times 10^{-5}$  M) in MeCN/Water (4/1,v/v; 35  $\mu\text{M}$  tris HCl buffer, pH 7.0) upon addition of  $\text{Hg}^{2+}$ .

## 6. Emission titration spectra of **1** with different concentrations of $\text{Hg}^{2+}$ ions

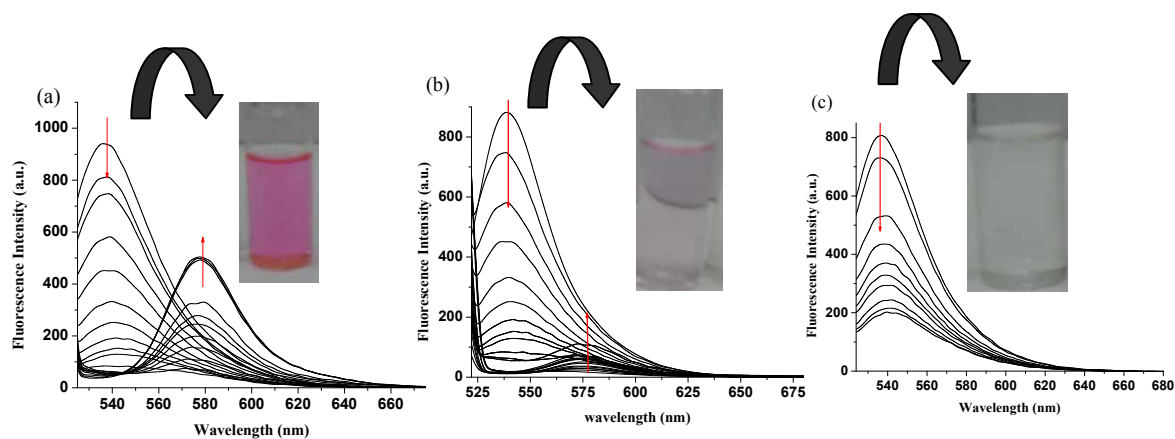

**Figure 6S.** Change in fluorescence spectra of **1** ( $c = 4.35 \times 10^{-5}$  M) in MeCN/Water (4/1,v/v; 10  $\mu\text{M}$  tris HCl buffer, pH 7.0) upon addition of (a)  $\text{Hg}^{2+}$  ( $c = 8.7 \times 10^{-4}$  M); (b)  $\text{Hg}^{2+}$  ( $c = 8.7 \times 10^{-5}$  M); (c)  $\text{Hg}^{2+}$  ( $c = 8.7 \times 10^{-6}$  M).

## 7. Test of reversibility in the binding process

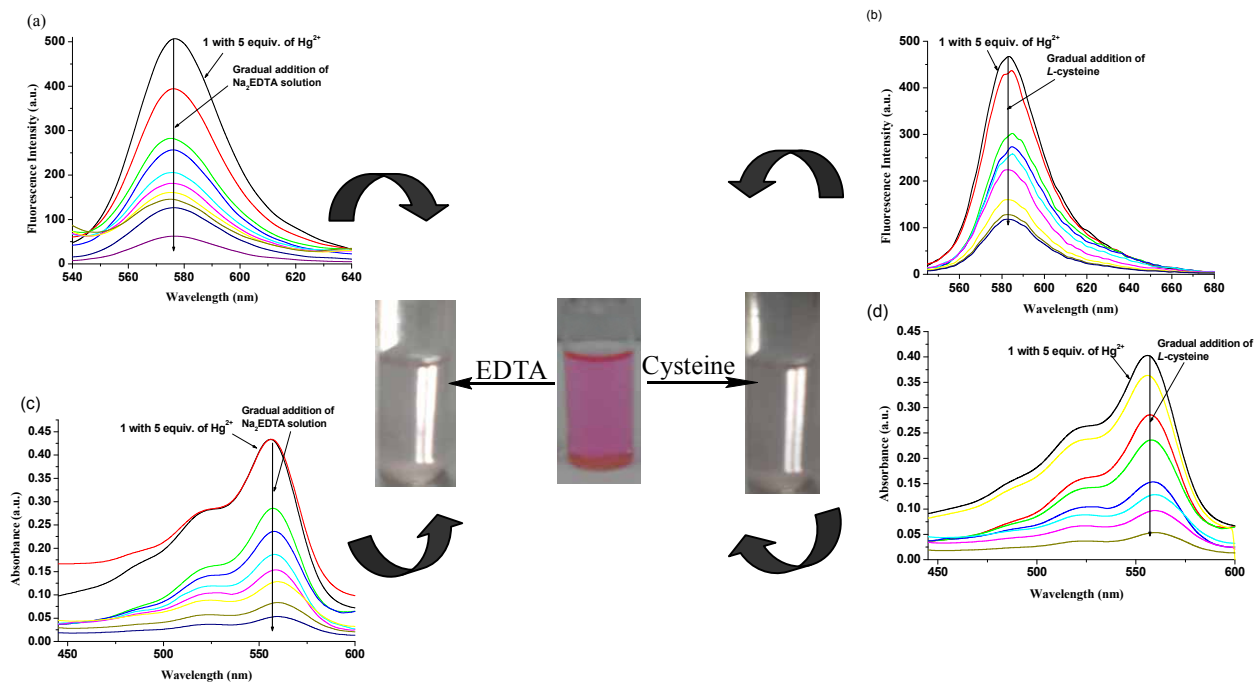

**Figure 7S.** Change in fluorescence spectra of **1**-Hg<sup>2+</sup> complex ( $c = 6.5 \times 10^{-5}$  M) in MeCN/Water (4/1, v/v; 10  $\mu$ M tris HCl buffer, pH 7.0) upon addition of (a) Na<sub>2</sub>EDTA ( $c = 4.5 \times 10^{-3}$  M); (b) Cysteine ( $c = 4.5 \times 10^{-3}$  M). Change in absorbance of **1**-Hg<sup>2+</sup> complex in CH<sub>3</sub>CN/H<sub>2</sub>O (4/1, v/v; 10  $\mu$ M tris HCl buffer; pH 7.0) upon addition of (c) Na<sub>2</sub>EDTA ( $c = 4.5 \times 10^{-3}$  M); (d) Cysteine ( $c = 4.5 \times 10^{-3}$  M) and associated colour changes.

8.  $^1\text{H}$  NMR of **1** ( $\text{CDCl}_3$ , 400 MHz):

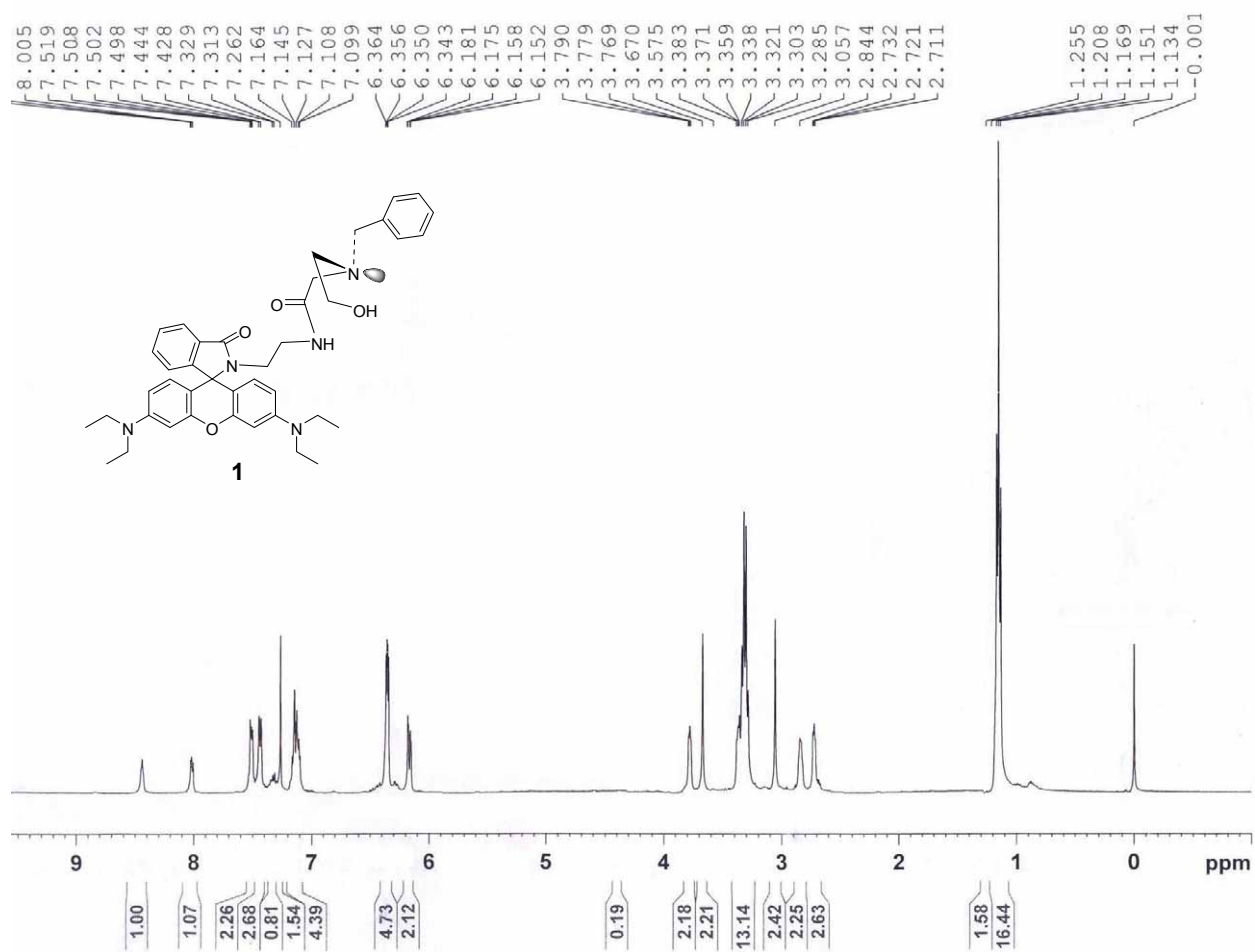

Figure S8.  $^1\text{H}$  NMR spectrum of receptor **1**.

9.  $^{13}\text{C}$  NMR of **1** ( $\text{CDCl}_3$ , 100 MHz):

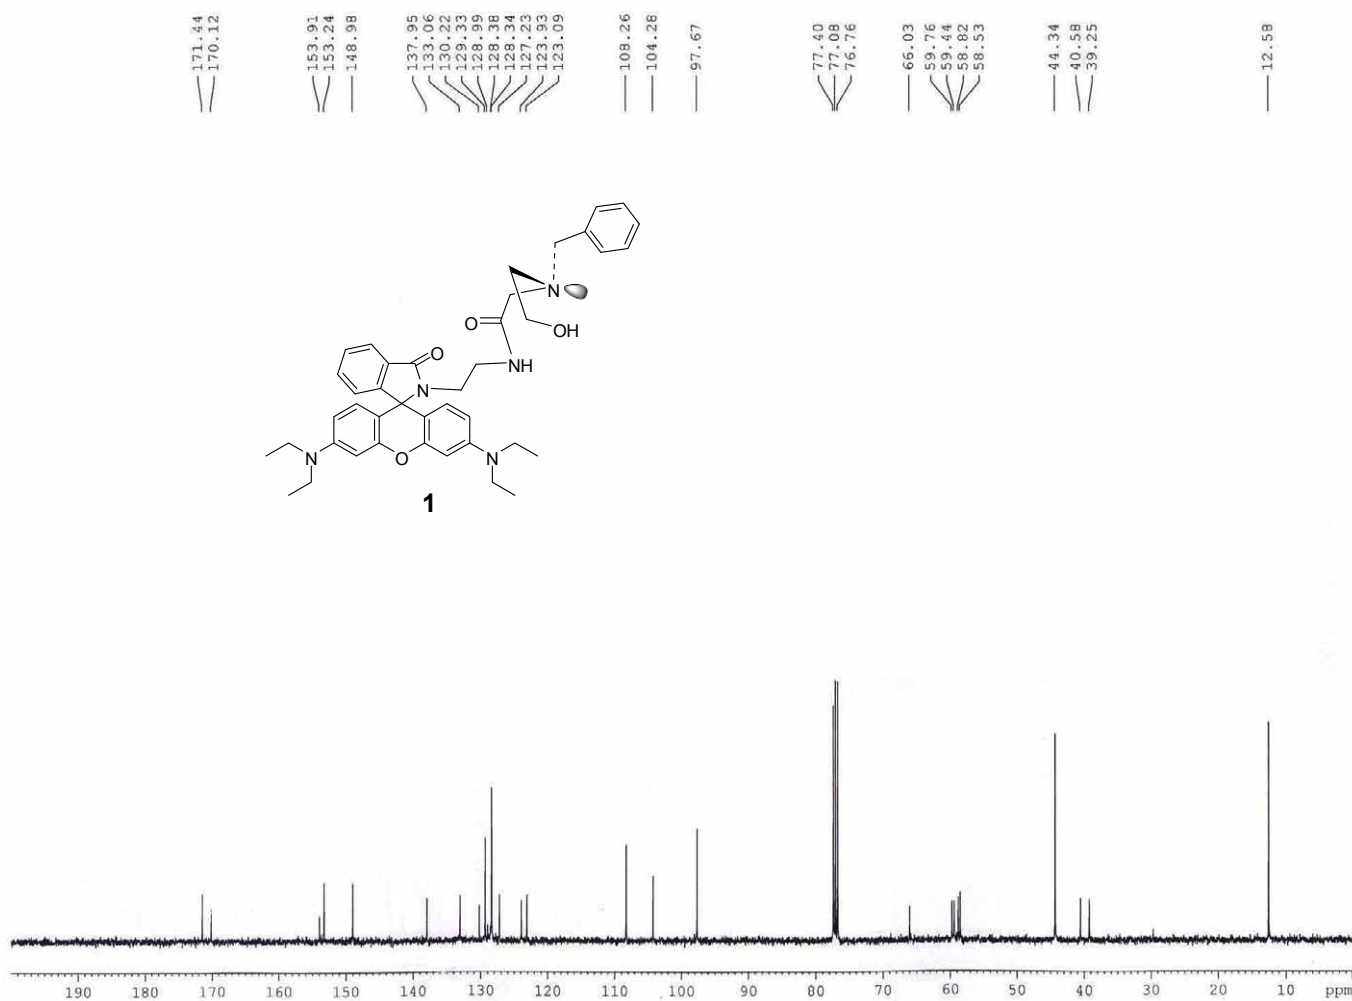

Figure 9S.  $^{13}\text{C}$  NMR spectrum of receptor **1**.

## 10. Mass of 1

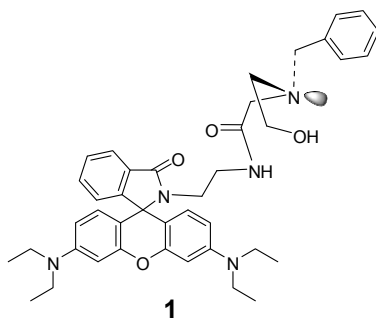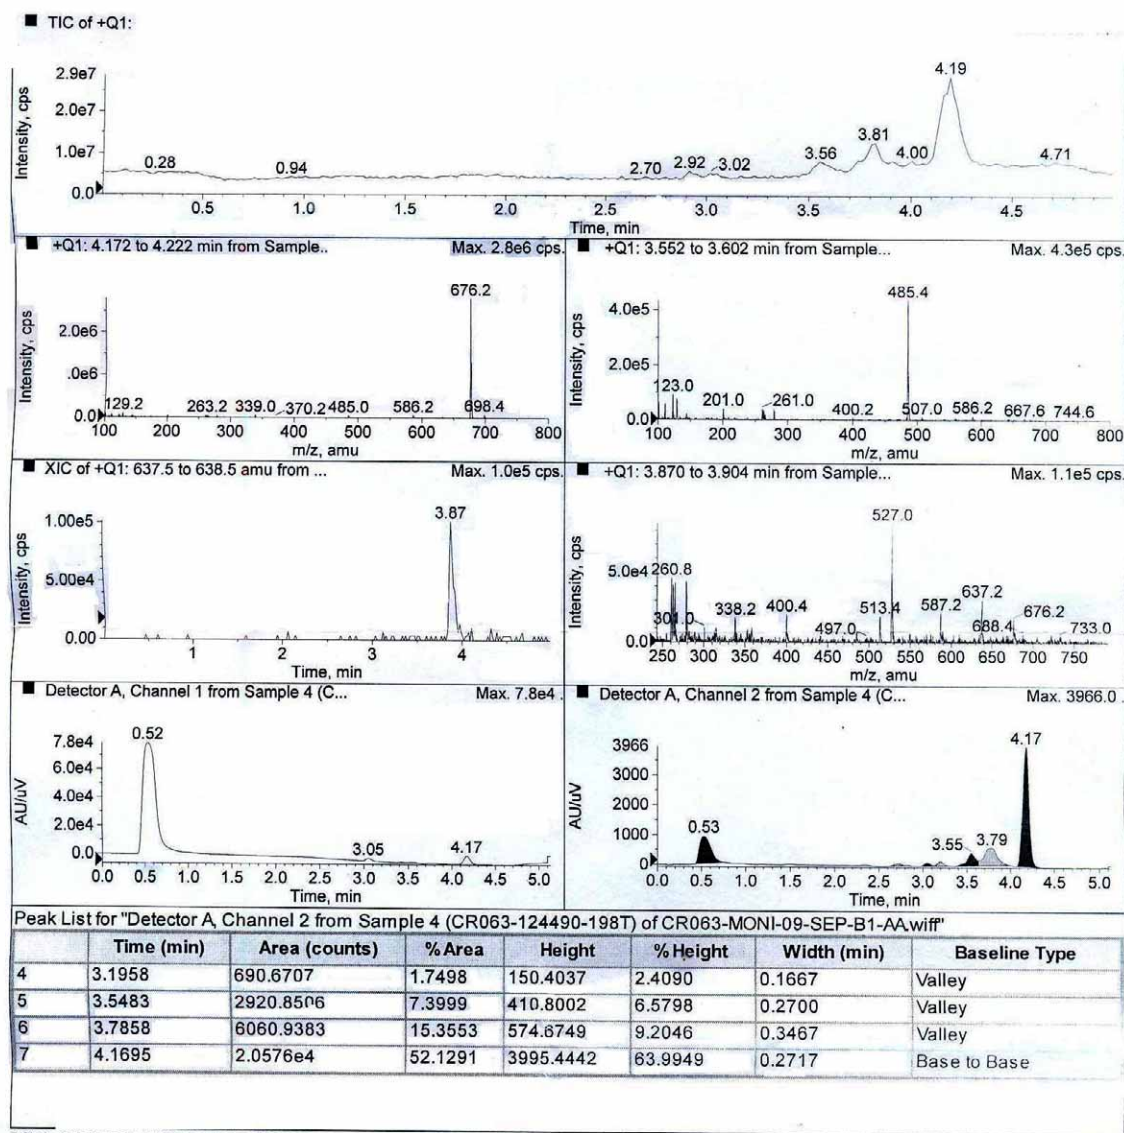

Figure 10. LCMS spectrum of receptor 1.



11.  $^{13}\text{C}$  NMR of **1** and **1** with 1.2 equiv. amounts of  $\text{Hg}(\text{ClO}_4)_2$  ( $\text{CDCl}_3$ , 100 MHz):

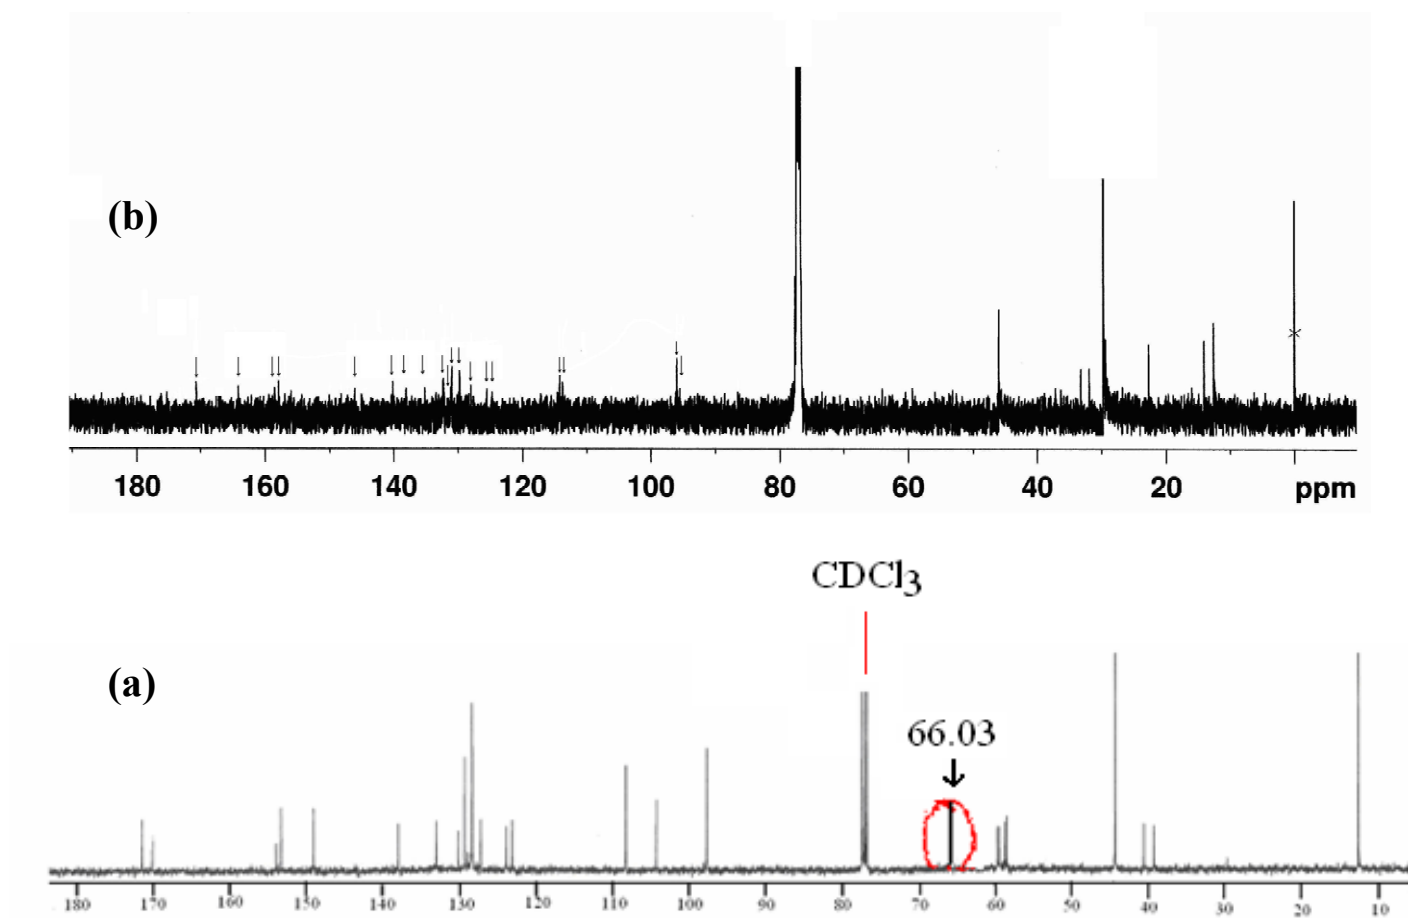

Figure 11S.  $^{13}\text{C}$  NMR spectrum of (a) receptor **1** and (b) **1** with 1.2 equiv. amount of  $\text{Hg}(\text{ClO}_4)_2$ .
